# Supplementary material for: Prediction of Cancer Proteins by Integrating Protein Interaction, Domain Frequency, and Domain Interaction Data Using Machine Learning Algorithms
Source: Hindawi journal article supplement (doi:10.1155/2015/312047), 2015-01-01
Supplement: f1 [file 312047.f1.zip]

## Appendix – Experimental results with unbalanced data

TABLE S1. Performance comparison for the individual algorithm sorted by F1 value  
(Unbalanced data).

| Type      | Algorithm                  | ACC   | SPE   | SEN   | F1    | MCC    | PPV   | AUC   |
|-----------|----------------------------|-------|-------|-------|-------|--------|-------|-------|
| lazy      | Kstar                      | 0.865 | 0.865 | 0.944 | 0.903 | 0.223  | 0.062 | 0.904 |
| rules     | Ridor                      | 0.862 | 0.862 | 0.847 | 0.854 | 0.172  | 0.043 | 0.855 |
| trees     | REPTree                    | 0.894 | 0.903 | 0.765 | 0.828 | 0.483  | 0.368 | 0.834 |
| trees     | LADTree                    | 0.866 | 0.867 | 0.785 | 0.824 | 0.225  | 0.082 | 0.826 |
| trees     | J48                        | 0.886 | 0.893 | 0.763 | 0.823 | 0.426  | 0.291 | 0.828 |
| trees     | J48graft                   | 0.886 | 0.893 | 0.764 | 0.823 | 0.424  | 0.289 | 0.828 |
| trees     | FT                         | 0.882 | 0.888 | 0.761 | 0.820 | 0.394  | 0.252 | 0.824 |
| trees     | SimpleCart                 | 0.883 | 0.891 | 0.741 | 0.809 | 0.408  | 0.280 | 0.816 |
| rules     | PART                       | 0.877 | 0.882 | 0.746 | 0.808 | 0.353  | 0.210 | 0.814 |
| trees     | ADTree                     | 0.865 | 0.867 | 0.729 | 0.792 | 0.222  | 0.088 | 0.798 |
| trees     | NBTree                     | 0.875 | 0.883 | 0.716 | 0.791 | 0.345  | 0.213 | 0.799 |
| rules     | OneR                       | 0.866 | 0.871 | 0.679 | 0.763 | 0.250  | 0.123 | 0.775 |
| rules     | DecisionTable              | 0.879 | 0.896 | 0.655 | 0.757 | 0.404  | 0.325 | 0.775 |
| rules     | Jrip                       | 0.865 | 0.869 | 0.664 | 0.753 | 0.229  | 0.107 | 0.767 |
| rules     | DTNB                       | 0.870 | 0.880 | 0.641 | 0.742 | 0.308  | 0.200 | 0.761 |
| functions | MultilayerPerceptron       | 0.859 | 0.862 | 0.607 | 0.712 | 0.136  | 0.044 | 0.735 |
| bayes     | BayesNet                   | 0.850 | 0.885 | 0.459 | 0.604 | 0.268  | 0.260 | 0.672 |
| functions | Logistic                   | 0.853 | 0.860 | 0.357 | 0.505 | 0.069  | 0.031 | 0.608 |
| functions | VotedPerceptron            | 0.849 | 0.863 | 0.354 | 0.502 | 0.099  | 0.066 | 0.608 |
| bayes     | BayesianLogisticRegression | 0.853 | 0.860 | 0.344 | 0.491 | 0.068  | 0.033 | 0.602 |
| functions | RBFNetwork                 | 0.856 | 0.858 | 0.324 | 0.470 | 0.027  | 0.006 | 0.591 |
| trees     | LMT                        | 0.794 | 0.883 | 0.290 | 0.437 | 0.177  | 0.306 | 0.586 |
| bayes     | NaiveBayes                 | 0.816 | 0.867 | 0.254 | 0.393 | 0.095  | 0.147 | 0.561 |
| bayes     | NaiveBayesUpdateable       | 0.816 | 0.867 | 0.254 | 0.393 | 0.095  | 0.147 | 0.561 |
| bayes     | NaiveBayesSimple           | 0.815 | 0.867 | 0.251 | 0.389 | 0.094  | 0.148 | 0.559 |
| misc      | HyperPipes                 | 0.597 | 0.885 | 0.183 | 0.303 | 0.096  | 0.526 | 0.534 |
| misc      | VFI                        | 0.329 | 1.000 | 0.176 | 0.299 | 0.195  | 1.000 | 0.588 |
| functions | SimpleLogistic             | 0.501 | 0.858 | 0.144 | 0.247 | 0.003  | 0.504 | 0.501 |
| trees     | RandomTree                 | 0.752 | 0.857 | 0.143 | 0.245 | 0.000  | 0.146 | 0.500 |
| lazy      | IB1                        | 0.755 | 0.857 | 0.140 | 0.241 | -0.003 | 0.139 | 0.501 |

|           |                       |       |       |       |       |        |       |       |
|-----------|-----------------------|-------|-------|-------|-------|--------|-------|-------|
| lazy      | Ibk                   | 0.755 | 0.857 | 0.140 | 0.241 | -0.003 | 0.139 | 0.501 |
| trees     | RandomForest          | 0.800 | 0.856 | 0.135 | 0.233 | -0.007 | 0.073 | 0.505 |
| bayes     | NaiveBayesMultinomial | 0.857 | 0.857 | NA    | NA    | NA     | 0.000 | NA    |
| functions | SMO                   | 0.857 | 0.857 | NA    | NA    | NA     | 0.000 | NA    |
| lazy      | LWL                   | 0.857 | 0.857 | NA    | NA    | NA     | 0.000 | NA    |
| rules     | ConjunctiveRule       | 0.857 | 0.857 | NA    | NA    | NA     | 0.000 | NA    |
| rules     | ZeroR                 | 0.857 | 0.857 | NA    | NA    | NA     | 0.000 | NA    |
| trees     | DecisionStump         | 0.857 | 0.857 | NA    | NA    | NA     | 0.000 | NA    |
| rules     | Nnge                  | NA    | NA    | NA    | NA    | NA     | NA    | NA    |

TABLE S2. Performance comparison by voting with the majority sorted by F1 value  
(Unbalanced data).

| Classifiers | ACC   | SPE   | SEN   | F1    | MCC   | PPV   | AUC   |
|-------------|-------|-------|-------|-------|-------|-------|-------|
| TOP: 37     | 0.862 | 0.861 | 0.967 | 0.911 | 0.165 | 0.033 | 0.914 |
| TOP: 35     | 0.863 | 0.863 | 0.951 | 0.905 | 0.194 | 0.047 | 0.907 |
| TOP: 33     | 0.865 | 0.865 | 0.930 | 0.896 | 0.221 | 0.062 | 0.898 |
| TOP: 25     | 0.869 | 0.869 | 0.922 | 0.895 | 0.271 | 0.095 | 0.895 |
| TOP: 31     | 0.868 | 0.867 | 0.919 | 0.892 | 0.255 | 0.084 | 0.893 |
| TOP: 5      | 0.871 | 0.870 | 0.908 | 0.889 | 0.289 | 0.109 | 0.889 |
| TOP: 3      | 0.866 | 0.866 | 0.911 | 0.888 | 0.233 | 0.071 | 0.888 |
| TOP: 21     | 0.870 | 0.870 | 0.907 | 0.888 | 0.281 | 0.104 | 0.888 |
| TOP: 23     | 0.871 | 0.87  | 0.906 | 0.888 | 0.283 | 0.105 | 0.888 |
| TOP: 29     | 0.870 | 0.869 | 0.903 | 0.886 | 0.276 | 0.101 | 0.886 |
| TOP: 27     | 0.870 | 0.870 | 0.900 | 0.885 | 0.280 | 0.104 | 0.885 |
| TOP: 19     | 0.873 | 0.872 | 0.891 | 0.881 | 0.306 | 0.125 | 0.882 |
| TOP: 17     | 0.876 | 0.875 | 0.881 | 0.878 | 0.333 | 0.150 | 0.878 |
| TOP: 13     | 0.879 | 0.880 | 0.873 | 0.876 | 0.366 | 0.183 | 0.876 |
| TOP: 15     | 0.878 | 0.878 | 0.870 | 0.874 | 0.353 | 0.171 | 0.874 |
| TOP: 7      | 0.881 | 0.882 | 0.861 | 0.871 | 0.379 | 0.199 | 0.871 |
| TOP: 9      | 0.881 | 0.883 | 0.846 | 0.864 | 0.383 | 0.207 | 0.864 |
| TOP: 11     | 0.879 | 0.880 | 0.847 | 0.863 | 0.365 | 0.190 | 0.863 |

TABLE S3. Performance comparison by voting with the majority for five classification types  
(Unbalanced data).

| Type      | Classifiers | ACC   | SPE   | SEN   | F1    | MCC    | PPV   | AUC   |
|-----------|-------------|-------|-------|-------|-------|--------|-------|-------|
| Bayes     | TOP: 3      | 0.845 | 0.866 | 0.351 | 0.500 | 0.123  | 0.101 | 0.608 |
|           | TOP: 5      | 0.816 | 0.867 | 0.254 | 0.393 | 0.095  | 0.147 | 0.561 |
| functions | TOP: 5      | 0.856 | 0.859 | 0.395 | 0.541 | 0.059  | 0.018 | 0.627 |
|           | TOP: 3      | 0.854 | 0.860 | 0.362 | 0.510 | 0.069  | 0.030 | 0.611 |
| lazy      | TOP: 3      | 0.755 | 0.857 | 0.14  | 0.241 | -0.003 | 0.139 | 0.501 |
| rules     | TOP: 3      | 0.866 | 0.866 | 0.905 | 0.885 | 0.230  | 0.070 | 0.885 |
|           | TOP: 7      | 0.866 | 0.866 | 0.861 | 0.863 | 0.227  | 0.073 | 0.863 |
|           | TOP: 5      | 0.869 | 0.869 | 0.850 | 0.859 | 0.265  | 0.101 | 0.860 |
| trees     | TOP: 11     | 0.881 | 0.882 | 0.843 | 0.862 | 0.380  | 0.206 | 0.863 |
|           | TOP: 3      | 0.885 | 0.887 | 0.820 | 0.852 | 0.410  | 0.246 | 0.854 |
|           | TOP: 7      | 0.883 | 0.885 | 0.821 | 0.852 | 0.394  | 0.228 | 0.853 |
|           | TOP: 9      | 0.883 | 0.886 | 0.817 | 0.850 | 0.398  | 0.234 | 0.851 |
|           | TOP: 5      | 0.885 | 0.889 | 0.802 | 0.843 | 0.412  | 0.256 | 0.845 |

TABLE S4. Performance comparison for the individual algorithm using the *CLD* feature sorted by F1  
(Unbalanced data).

| Type  | Algorithm     | ACC   | SPE   | SEN   | F1    | MCC   | PPV   | AUC   |
|-------|---------------|-------|-------|-------|-------|-------|-------|-------|
| bayes | BayesNet      | 0.858 | 0.858 | 1.000 | 0.924 | 0.076 | 0.007 | 0.929 |
| trees | LADTree       | 0.858 | 0.858 | 1.000 | 0.924 | 0.076 | 0.007 | 0.929 |
| trees | NBTree        | 0.858 | 0.858 | 1.000 | 0.924 | 0.076 | 0.007 | 0.929 |
| trees | FT            | 0.859 | 0.859 | 0.996 | 0.922 | 0.110 | 0.014 | 0.927 |
| rules | DecisionTable | 0.859 | 0.858 | 0.954 | 0.903 | 0.097 | 0.012 | 0.906 |
| rules | DTNB          | 0.859 | 0.858 | 0.954 | 0.903 | 0.097 | 0.012 | 0.906 |
| rules | Ridor         | 0.857 | 0.857 | 0.917 | 0.886 | 0.022 | 0.001 | 0.887 |
| trees | SimpleCart    | 0.859 | 0.859 | 0.892 | 0.875 | 0.117 | 0.019 | 0.875 |
| lazy  | Ibk           | 0.897 | 0.903 | 0.816 | 0.857 | 0.500 | 0.362 | 0.859 |
| trees | RandomTree    | 0.897 | 0.903 | 0.816 | 0.857 | 0.500 | 0.362 | 0.859 |
| trees | RandomForest  | 0.893 | 0.899 | 0.792 | 0.842 | 0.474 | 0.340 | 0.846 |
| trees | REPTree       | 0.863 | 0.864 | 0.761 | 0.809 | 0.188 | 0.060 | 0.812 |
| rules | OneR          | 0.866 | 0.871 | 0.679 | 0.763 | 0.250 | 0.123 | 0.775 |
| rules | Jrip          | 0.857 | 0.857 | 0.610 | 0.713 | 0.029 | 0.002 | 0.734 |
| rules | Nnge          | 0.855 | 0.907 | 0.491 | 0.637 | 0.377 | 0.431 | 0.699 |
| lazy  | IB1           | 0.841 | 0.911 | 0.448 | 0.601 | 0.367 | 0.472 | 0.680 |

|           |                            |       |       |       |       |       |       |       |
|-----------|----------------------------|-------|-------|-------|-------|-------|-------|-------|
| functions | VotedPerceptron            | 0.849 | 0.860 | 0.296 | 0.440 | 0.064 | 0.043 | 0.578 |
| bayes     | NaiveBayes                 | 0.851 | 0.859 | 0.290 | 0.434 | 0.051 | 0.029 | 0.575 |
| bayes     | NaiveBayesSimple           | 0.851 | 0.859 | 0.290 | 0.434 | 0.051 | 0.029 | 0.575 |
| bayes     | NaiveBayesUpdateable       | 0.851 | 0.859 | 0.290 | 0.434 | 0.051 | 0.029 | 0.575 |
| functions | Logistic                   | 0.856 | 0.857 | 0.274 | 0.415 | 0.017 | 0.004 | 0.566 |
| bayes     | BayesianLogisticRegression | 0.856 | 0.857 | 0.268 | 0.408 | 0.012 | 0.002 | 0.563 |
| functions | SimpleLogistic             | 0.501 | 0.858 | 0.144 | 0.247 | 0.003 | 0.504 | 0.501 |
| misc      | HyperPipes                 | 0.501 | 0.858 | 0.144 | 0.247 | 0.003 | 0.504 | 0.501 |
| trees     | LMT                        | 0.502 | 0.859 | 0.144 | 0.247 | 0.004 | 0.505 | 0.502 |
| bayes     | NaiveBayesMultinomial      | 0.857 | 0.857 | NA    | NA    | NA    | 0.000 | NA    |
| functions | MultilayerPerceptron       | 0.857 | 0.857 | NA    | NA    | NA    | 0.000 | NA    |
| functions | RBFNetwork                 | 0.857 | 0.857 | NA    | NA    | NA    | 0.000 | NA    |
| functions | SMO                        | 0.857 | 0.857 | NA    | NA    | NA    | 0.000 | NA    |
| lazy      | Kstar                      | 0.857 | 0.857 | NA    | NA    | NA    | 0.000 | NA    |
| lazy      | LWL                        | 0.857 | 0.857 | NA    | NA    | NA    | 0.000 | NA    |
| misc      | VFI                        | 0.143 | NA    | 0.143 | NA    | NA    | 1.000 | NA    |
| rules     | ConjunctiveRule            | 0.857 | 0.857 | NA    | NA    | NA    | 0.000 | NA    |
| rules     | PART                       | 0.857 | 0.857 | NA    | NA    | NA    | 0.000 | NA    |
| rules     | ZeroR                      | 0.857 | 0.857 | NA    | NA    | NA    | 0.000 | NA    |
| trees     | ADTree                     | 0.857 | 0.857 | NA    | NA    | NA    | 0.000 | NA    |
| trees     | DecisionStump              | 0.857 | 0.857 | NA    | NA    | NA    | 0.000 | NA    |
| trees     | J48                        | 0.857 | 0.857 | NA    | NA    | NA    | 0.000 | NA    |
| trees     | J48graft                   | 0.857 | 0.857 | NA    | NA    | NA    | 0.000 | NA    |

TABLE S5. Performance comparison by voting with the majority using the *CLD* feature sorted by F1  
(Unbalanced data) .

| Classifiers | ACC   | SPE   | SEN   | F1    | MCC   | PPV   | AUC   |
|-------------|-------|-------|-------|-------|-------|-------|-------|
| TOP: 3      | 0.858 | 0.858 | 1.000 | 0.924 | 0.076 | 0.007 | 0.929 |
| TOP: 5      | 0.858 | 0.858 | 1.000 | 0.924 | 0.076 | 0.007 | 0.929 |
| TOP: 7      | 0.858 | 0.858 | 1.000 | 0.924 | 0.076 | 0.007 | 0.929 |
| TOP: 29     | 0.858 | 0.857 | 1.000 | 0.923 | 0.055 | 0.004 | 0.929 |
| TOP: 31     | 0.858 | 0.857 | 1.000 | 0.923 | 0.054 | 0.003 | 0.929 |
| TOP: 33     | 0.858 | 0.857 | 1.000 | 0.923 | 0.054 | 0.003 | 0.929 |
| TOP: 35     | 0.858 | 0.857 | 1.000 | 0.923 | 0.054 | 0.003 | 0.929 |
| TOP: 13     | 0.859 | 0.859 | 0.996 | 0.922 | 0.115 | 0.016 | 0.928 |

|         |       |       |       |       |       |       |       |
|---------|-------|-------|-------|-------|-------|-------|-------|
| TOP: 15 | 0.859 | 0.859 | 0.996 | 0.922 | 0.115 | 0.016 | 0.928 |
| TOP: 17 | 0.859 | 0.859 | 0.996 | 0.922 | 0.115 | 0.016 | 0.928 |
| TOP: 9  | 0.859 | 0.858 | 0.995 | 0.921 | 0.095 | 0.011 | 0.927 |
| TOP: 11 | 0.859 | 0.858 | 0.995 | 0.921 | 0.099 | 0.012 | 0.927 |
| TOP: 19 | 0.859 | 0.859 | 0.982 | 0.916 | 0.102 | 0.012 | 0.920 |
| TOP: 27 | 0.858 | 0.858 | 0.983 | 0.916 | 0.091 | 0.010 | 0.921 |
| TOP: 21 | 0.859 | 0.858 | 0.977 | 0.914 | 0.099 | 0.012 | 0.918 |
| TOP: 23 | 0.858 | 0.858 | 0.978 | 0.914 | 0.091 | 0.010 | 0.918 |
| TOP: 25 | 0.859 | 0.858 | 0.950 | 0.902 | 0.097 | 0.012 | 0.904 |
| TOP: 37 | 0.857 | 0.857 | NA    | NA    | NA    | 0.000 | NA    |
| TOP: 39 | 0.857 | 0.857 | NA    | NA    | NA    | 0.000 | NA    |
