# Supplementary material for: Prediction of Cancer Proteins by Integrating Protein Interaction, Domain Frequency, and Domain Interaction Data Using Machine Learning Algorithms
Source: Biomed Res Int. 2015 Mar 17;2015:312047. doi: 10.1155/2015/312047 (PMC4381656; doi:10.1155/2015/312047)
Supplement: Supplementary file 1 — Experimental results with unbalanced data. Here, the corresponding experimental results of the unbalanced dataset are listed in Appendix Tables S1 to S5, where the performance of MCC and PPV is much worse due to the very large TN and very small TP. Therefore, the use of balanced datasets is more preferable. Supplementary File 2: List of the 1302 cancer proteins for Case Study 1. List of the 1302 cancer proteins extracted from the OMIM and HLungDB data-bases, that are not appear in our original training dataset. The 1302 cancer pro-teins are used as an independent test dataset for Case Study 1. Supplementary File 3: List of the 565 potential cancer genes derived from Case Study 2. List of the 565 potential cancer genes derived from four sets of lung cancer mi-croarray data by our method. Five classifiers, including LMT, SimpleCart, J48, LWL and Ridor algorithms were selected for evaluating potential cancer genes under strictly uniformed voting; that is, only the one with five votes which all five classifiers predict as a cancer protein was considered. The 565 potential cancer genes are good targets for future experimental investigation. [file 312047.f1.zip › 312047.f1/paper-cancer-PPI-suppl-files/Supplementary File 2_Case study 1.txt]

ATP6V1G1
ANXA3
KLHDC3
RPA2
CITED2
FGF12
SRRM2
CD46
ITGAM
ABCC1
TLE1
CSNK2A1
GADD45A
PITX2
RPS14
WSB1
ATF2
SERBP1
TXN
DCN
PCNA
LGALS1
TRIM28
BTBD2
PPP2R4
HSPA5
PSMA3
CCL18
MTA1
TOP2A
CCT5
EPOR
MUC1
DCX
LMNB1
COX17
PRKCA
CD14
CPE
SNRPD2
CRELD1
KRT18
LMNA
FEN1
IL1A
TOP1
DNAJB9
ASPSCR1
CASP3
KLK2
MCM7
ENO2
KRT17
UBE2L3
XRCC5
SHANK2
FTH1
CALM1
RAP1GDS1
MYO1C
PIK3R3
GSTM4
ZEB1
HNRNPH1
TNNC1
UNC13B
PRMT1
HSPA8
XPC
SFPQ
MAGED1
ARL4C
CALU
LAMA4
LARS
PSMB2
PSMB4
STXBP1
UBE2C
CDC37
IFRD2
DDX18
EIF5A
SND1
ID2
MRPL42
HSPA9
PKN2
GABPA
AP2S1
MRPS12
CCNB1IP1
FKBP4
CRYAB
SSB
PSMA6
UGCG
IFI35
F11R
PSMD10
BPTF
PAICS
RUVBL2
ITGA3
COL2A1
GRB10
IGF2BP1
ATXN1
PSMA2
STOML2
LPP
PRDX1
RABGAP1L
PSMD11
GADD45B
RAB3GAP1
CD99
RAC2
BIRC7
SAT1
GAPDH
PRNP
SERPIND1
SEPHS1
CCNB1
GOLGA2
SNRPF
SUMO3
SMARCC1
CCT2
SUMO2
SNRPG
NEDD9
SSR1
MALT1
PRSS23
TERF1
TGIF1
PKP4
TM4SF1
TGM2
UPF3A
IL1R1
TOMM20
ALDOB
PARP4
CRIP2
CSNK1A1
CSNK2A2
TUBB3
PGC
PHACTR3
ARL4D
HDAC9
CD83
IRS2
GHR
TNFRSF1B
ANXA11
ZBTB43
VIM
DHCR24
PKM2
H2AFX
EEF1D
MUTYH
DYNLL1
CCNA1
RERE
CYP2E1
PDCD6
CARM1
EIF6
ABLIM1
HSPE1
BIRC2
FARSA
ARHGAP24
BIRC3
DCLK1
EPHB3
EPS8
ILK
LSM2
KRT15
STOM
MIF
PSMD2
ANXA4
CLEC3B
YY1
PAFAH1B1
KRT19
S100A1
SERPINE1
SIAH2
MRE11A
RPL10A
PRKCE
TUBB2A
TIMP1
AP2M1
HSPA4
ACTN1
IGF2
H3F3B
CACNA1C
XRCC4
ACTL6A
CALCOCO2
CDK5
TBL1X
PTN
HSF1
TRAM1
RNF103
AQP1
SELENBP1
HOXB9
CDK9
BCCIP
GRB2
CD79A
CBS
CD44
GART
C1QBP
CD9
HSPD1
CD53
FNDC3A
SRP9
GTF2I
GLUL
STAT1
GRN
RAD23A
TUBA1A
LSS
RGS5
NR2F1
HP
REST
ILF3
IFIT1
FASLG
PMM1
NONO
FBP1
CBX3
ITPR1
GEM
IL2RG
LIMA1
IL15
SUV39H2
TRIM29
PDLIM1
FEZ2
ATG12
FOSL2
LDLR
AMFR
EIF3H
CXADR
PTPRC
NAP1L1
LAMB2
KRT6A
PGF
SERP1
CD8A
TNNT1
EIF3A
NUPR1
CRMP1
MCM2
CXCL9
MAP2K1
CENPA
BCAP31
CSNK1D
MMP14
EZR
OTUB1
RPL26
HSPB2
MAPRE2
CEACAM5
RGS6
DMD
PGRMC1
ARNT
PRPF19
HPCAL1
PSMB5
AHR
CAPN1
TXNRD1
NCAM1
NCALD
MGMT
ADRB2
PJA2
MEOX2
COPB2
HMOX1
LIG1
SIVA1
MCM6
IFLTD1
AP1G1
XRCC3
MYL6B
PSMA4
POR
RPL15
MED1
RPL17
EHMT2
FBL
E4F1
FCGR2A
TPX2
ILF2
SERPING1
OAZ1
APOE
CAPN2
ADD1
PPP2CB
FAM107A
SDC1
AZGP1
ETF1
DVL3
CEACAM6
CCL5
SCNN1A
RGS16
PDE4D
BUB3
RASGRF2
PRDX2
PPL
OLFML2A
GCLC
ITGA6
MORF4L2
BRD2
TSC22D3
MEST
UBA7
SERPINH1
EXO1
TNKS2
ITGB5
PTPN23
APEH
SF3B3
S100A13
CIT
C15orf55
EIF4E
ACTN4
BRD4
PSMD1
TBX2
ACTR2
GC
SPTAN1
SPRY1
PPP1R12A
LGALS9
ARF6
NDUFB5
PON2
ATF5
RPS11
ACTR3B
PRDX4
BRD3
SIRT5
KHDRBS1
KRTCAP2
TUBA4A
ATP5A1
SAP18
ETFA
OBFC1
SCNN1B
DUSP1
PELI1
RPL6
PPP1R10
SMAD6
PTP4A3
CASP4
PTP4A2
NUDT3
PKIG
CD40
BIRC6
BAZ1A
SH3BP5
FABP4
ID3
PLEKHB2
EIF4A3
AKTIP
TIMP2
LAMC1
COL4A1
CSF3R
POLR2H
DDOST
PFKM
KIAA1967
MYH10
TKT
COX5A
TALDO1
COL6A2
HSPA1A
HSP90B1
TAX1BP3
CORO1A
ASS1
GABARAPL2
RPL37A
PTOV1
RGS1
RBCK1
CHMP2A
C3orf26
IFNGR1
MARK1
PPIE
ENSA
EDNRB
PIK3R2
ZNF35
GANAB
TPI1
STIP1
WARS
ABI3BP
PRPF40A
GCAT
SMARCA1
CLIC4
TFRC
TFPI
PYCARD
NNMT
FOLR1
SSTR2
GNB1
H1F0
ARPC1A
CYFIP2
IL10RA
TPM3
GDI2
TMED9
TNFRSF14
KIFC1
PGK1
NME4
ATP1B1
GPI
DUSP4
HMGB1
ALDOA
DGKA
SAR1A
DNAJA1
SLCO2B1
DKC1
NUDT1
INPP1
PRDX6
THOP1
SRRM1
APEX1
HMGCR
OLFM1
ACY1
NDUFS6
SOD1
ARHGAP9
TPM2
CAPRIN1
BMPR2
ZMAT3
NDUFB1
LSR
SLA
SULT1A1
HDLBP
KYNU
TSR1
JAG1
KIF5B
MBD4
CREB3L2
FLNB
NMNAT1
TLN1
LAPTM5
MEIS2
DSG3
FANCF
AHSA1
CFH
FHL1
ODC1
AGR2
H2AFY
CCT3
UBE2T
TPT1
PSAP
CASP10
FTL
HEXA
FERMT3
PRDX3
C21orf33
ZWINT
PSME2
HMGB3
H2AFZ
GSN
PFAS
KLF9
NFRKB
H2AFV
TTLL12
PTGDR
TAX1BP1
XBP1
PRKD2
POLL
IL7
GSTA1
EIF4G1
GCH1
LTA4H
ACOT1
MKI67
PRELP
ACAT2
BMP7
PGD
LDHB
CYCS
DBN1
RASGRF1
ERCC4
CRP
USO1
CDH5
RSL1D1
IL7R
GOT1
KRT7
SNRPB
ETHE1
LIFR
LAGE3
MAP4
PURA
CSDA
PCBP2
DPYSL2
XPOT
FKBP9
STK39
ERCC3
NQO1
GM2A
HYOU1
ATP6V1A
CD33
VEZT
GORASP2
FCGR3A
SRP54
GIPR
GBP1
HLA-DMA
USP25
CASP9
TJP2
FTO
CXCL13
GNS
USP11
VWF
THUMPD1
HCLS1
S100A8
DRD2
CAMKK1
CNTN1
PDIA6
POLR2F
PSIP1
IFI27
NARS
CERK
GNLY
ARHGDIB
C4BPA
AGER
SUB1
FGB
ETFB
MARCKSL1
NPR3
ACTR3
KLK13
SSR4
XPA
TPM4
CCBP2
PDLIM5
C1S
PPAP2B
ASGR1
PLP2
RNF187
UBE2W
ICAM1
CTSC
PTGS1
NAT2
ALDH7A1
AHCY
ELMO1
RPN2
KLK7
SDC4
PICALM
PPIA
EPS8L3
KPNA1
SGCG
APBB2
THBS1
SRGN
LGALS3
FOXM1
CREM
EIF3M
CLDN3
FZD6
NR0B1
ARCN1
NR2C2
HLA-DRA
PTRF
CD55
MSLN
CSTA
FUCA1
DSG2
CLDN1
VCAN
SPARC
TDG
RPS6KA2
CSRP1
PTPRZ1
SERPINB3
STRAP
GAP43
CYB5A
ANXA6
ITIH2
CCT8
CTSL1
TCEAL4
IGF2BP3
MAGEA4
ADAMTS1
PKP3
ARL6IP5
UTRN
CALB1
SOX2
MAPK8IP1
SLPI
COPA
STARD10
DSP
TRIM16
NOTCH3
COG3
RRM2
FSCN1
ALOX5
INS
ZC3H7B
PFN2
MINA
FGG
PTGIS
CXCL14
POLR2D
PLA2G1B
MACF1
TIE1
PCSK1
DOK4
MAG
UBR4
PGAM1
ME1
SPDEF
ATP6V1B2
DPYSL3
GMPS
C22orf25
MFAP2
NPEPPS
SLC38A2
MDK
NTRK3
UBE2E3
VSIG4
NRGN
ERCC5
CRABP2
LRRFIP1
IL1RL1
EIF3B
RAC3
COX4I1
GABARAPL1
SF3A2
UBD
PAM
ACAA1
NFE2L1
HLA-DRB4
BMP4
ACADVL
PRKACB
KIF13B
AKR1C3
INHBB
ARFGEF2
MARCKS
CCT6A
CGA
CLPTM1L
SELL
MGLL
ERCC1
NDUFB8
WDR1
STAMBPL1
UBA1
ARHGAP26
ACE
SLC1A5
MAGEA1
NEFL
ANLN
DCTN3
BASP1
WFDC2
ARL6IP1
ASAH1
COL7A1
BCAM
KCTD12
CBX1
COL9A2
COX6C
CSTB
MALL
DNM1
CGN
SH3BGRL
PLOD2
ITM2B
IRF6
SLC2A1
S100A6
HBA1
MEA1
NNT
TMF1
GCLM
MAPK4
NACA
FBN1
RPL21
NT5E
METTL1
FEZ1
ADAM9
STC2
FBLN2
KLC1
CD34
CSF2
TOP2B
SHFM1
DSC2
PAIP1
BATF3
SCGB1A1
TNS4
ARHGEF11
TRO
AVP
TUBG1
FDPS
RANBP1
RFC4
C7orf44
PPP2R5A
LIG4
HDGF
LRIG1
COL10A1
VIPR1
CREB3L1
BMP1
FKBP1B
SCAMP1
COL6A1
TNFRSF25
LHCGR
MAGEA3
PILRA
FAM57A
GPX1
HLA-DPA1
CLDN8
CLDN4
CLDN7
CLDN5
SERPINA1
CP
SERPINB6
SIRPB1
PTPRM
CYBB
CKB
NR2C2AP
ACSM3
RIN2
SESN1
FST
FTCD
ABCE1
CHRNA4
IL18R1
LTA
TBC1D4
PLXNA2
PLXND1
TCF21
NME1-NME2
C1QB
PKP1
HSPA1B
CFB
PFKP
CYP17A1
PEX6
SERINC1
KLK8
SNX6
CAPZA2
EPO
CYP2C18
KLHL9
RCAN2
HOXD3
TTC3
KRT81
LMO7
NEK3
MYCBP2
ALDH1A1
UBE2J1
DTX4
GLRX
FAM48A
MASP1
HLA-DMB
C1R
PTPRN2
ADH1B
B3GNT5
ENTPD4
GSTM2
RACGAP1
LTBP4
SSTR1
HSBP1
ABCC5
KAL1
ALOX5AP
A1BG
NOD2
THBS2
ALDOC
ABCC6
MAZ
APLP2
DCP2
MAOA
RNF19B
PSMD3
ANGPTL4
PSMB9
RHOBTB3
ELP3
HLF
HOXC9
PAX9
SHOX2
SNAPC1
LAPTM4B
SIX1
QSOX1
SEC24D
DDIT4
SCPEP1
LGMN
NUDCD1
BCLAF1
GLTP
JAM3
EIF4EBP1
SRP72
SYPL1
C11orf9
LARP1
LSM14A
ATP2A2
XK
NCF4
CHPF
TMED2
NIPSNAP1
TSPO
BOLA2
ATP13A3
CALML5
BAIAP3
RTN1
PLOD1
NAPSA
PCCA
WSB2
KRT16
ARHGAP4
MTHFD2
PYCR1
P4HA1
IL1RN
SMUG1
STX1B
RPL35A
TUBB2B
FZD9
KRT13
HEBP2
KIAA0182
MPP1
SEMA6A
ADD3
COG1
C10orf10
COL16A1
KIAA0284
SGCE
SRGAP2
FAM103A1
DDAH2
TCF25
LYZ
LMO3
ARF4
PDGFA
NPTN
CTSD
QDPR
GMIP
SQLE
TJP3
SLC7A5
ECM1
NFATC3
SPINT1
C7
COX5B
KRT4
VDAC3
PDGFC
SLIT3
PTGDS
TLE2
AHSG
ALG3
IPO8
ATP2A3
TMED10
THADA
RTEL1
ALDH3A2
PDXK
TSPAN3
NUF2
REEP5
FARP1
RNASE1
VIP
GJA3
WHSC1L1
SERPINE2
TMSB4X
C15orf44
SCG5
GGH
YARS
AMY1A
SLC4A7
DPYSL4
ARHGAP12
PDRG1
NID2
DHCR7
ARHGAP23
APOD
MYH11
FDXR
HKDC1
TSPAN14
ERCC2
ALDH3B1
GPR56
CHN1
SEPHS2
CHN2
STAB1
PHPT1
PARVB
ACP1
CBR1
AMIGO2
FABP5
FCGRT
C10orf26
ARF3
NELL2
COX7A2L
SLTM
ATP1B3
KIDINS220
GAA
SLC39A14
GLG1
ATP5L
DUS2L
NPTX1
TFPI2
KIF11
SVEP1
SPARCL1
LDB2
S100A14
S100A3
CYP11A1
CSH2
DCBLD2
ATP6V0D1
KLK5
ABCA3
PPAP2C
STT3A
ALPP
GNG10
EPHX1
CTSL2
DPYSL5
SEC14L1
ARHGAP21
AMD1
API5
CCL19
PCDH7
ANGPT2
TMEM106C
NAT1
C14orf2
PENK
IMPA2
TMEM115
ABCC3
FCGBP
SERPINF1
CHGA
CRYM
PTGER4
SORL1
GSTM3
MMP3
LRP5L
MRPL17
CRIP1
GSTA4
ALOX15B
COMT
MRPL30
LIPA
FCER1G
CHRNA5
PREPL
NEBL
SENP7
AQP3
CFD
MT1A
MYLK2
METTL7A
SELT
OXT
HOXD13
ABCC10
PBX2
SEPP1
CXCL6
SNX10
SYT11
NMU
C9orf9
RDH10
CTSH
SCGB3A2
IVD
PLTP
CTSK
EHBP1
MCM8
MC1R
ANGPT1
TBC1D9
SULF2
PPM1J
SLC7A8
FGF9
SLC26A1
DMRT2
MMP8
RGL3
YPEL5
IGJ
KIAA1199
NKTR
PCYOX1
FBN2
CCR1
BTN3A2
AHCYL2
GNAT1
SYNE1
EML4
ACP5
MRC2
SOAT1
ARHGAP19
HLA-DQB1
CD97
IQSEC1
ARHGAP25
NPC2
SLC7A7
CYBRD1
CD164
TIPARP
RBP4
AKR1C1
IER2
PLCL1
ITIH1
PDE4C
LY6E
FSTL3
PIGA
GPR126
PHF20
ISG20
ITM2A
TRIB1
CTAG1B
MT1X
GPC1
HEG1
MYL9
MT1F
MT1E
SERPINA3
FADS3
RASA4
IGFBP2
CTAG2
ST6GAL1
CST3
SLC39A6
STARD7
PSTPIP2
MXRA5
AGRN
ITGA9
SERPINB1
LDHC
SLC7A11
IDI1
IFI44
SLC1A4
SC5DL
SLC2A3
MPO
CABYR
PCOLCE
CDA
CRIM1
CYP1B1
DPYD
TDP1
LAMB3
KCNK3
OLR1
VAMP5
SLC6A8
SLC19A1
SSR2
TMEM106B
GCHFR
CARD10
CCL8
MFAP4
TRIM2
POLD2
CPNE3
TNFRSF21
ADH7
BTD
SEMA3F
SEC61G
CPVL
CPD
PNPLA6
CYP2C19
CLDND1
CHI3L2
ATP5G3
CLPTM1
ATP11A
PRR4
ATP11B
TSPYL5
EMP3
ZNF160
ITIH3
RFTN1
NUDT6
ENPP2
PTDSS1
KDELR2
HLCS
MICAL2
STEAP1
TTC17
CCL21
CCL20
COL11A1
TCTEX1D4
AGA
APOC1
PAPOLG
TFF3
SLC4A4
LEAP2
PPP1R14C
ARHGAP20
ANXA8L2
RNASEH1
COBL
ALDH3A1
AUTS2
AKR1C2
AKR1C4
