# Supplementary material for: Prediction of Cancer Proteins by Integrating Protein Interaction, Domain Frequency, and Domain Interaction Data Using Machine Learning Algorithms
Source: Biomed Res Int. 2015 Mar 17;2015:312047. doi: 10.1155/2015/312047 (PMC4381656; doi:10.1155/2015/312047)
Supplement: Supplementary file 1 — Experimental results with unbalanced data. Here, the corresponding experimental results of the unbalanced dataset are listed in Appendix Tables S1 to S5, where the performance of MCC and PPV is much worse due to the very large TN and very small TP. Therefore, the use of balanced datasets is more preferable. Supplementary File 2: List of the 1302 cancer proteins for Case Study 1. List of the 1302 cancer proteins extracted from the OMIM and HLungDB data-bases, that are not appear in our original training dataset. The 1302 cancer pro-teins are used as an independent test dataset for Case Study 1. Supplementary File 3: List of the 565 potential cancer genes derived from Case Study 2. List of the 565 potential cancer genes derived from four sets of lung cancer mi-croarray data by our method. Five classifiers, including LMT, SimpleCart, J48, LWL and Ridor algorithms were selected for evaluating potential cancer genes under strictly uniformed voting; that is, only the one with five votes which all five classifiers predict as a cancer protein was considered. The 565 potential cancer genes are good targets for future experimental investigation. [file 312047.f1.zip › 312047.f1/paper-cancer-PPI-suppl-files/Supplementary File 3_Case study 2.txt]

ARRB1
ANXA3
LIMK1
PRKCH
STAC
CAPN3
LMNB1
SRPK1
ERAL1
H2AFV
DCN
HBEGF
FZD4
AIMP2
CDK1
IGF2BP3
PPP4C
HDAC4
PIAS1
NR2F2
ID3
VAMP2
TNNC1
YTHDF1
HSPA4
KDM5B
IPO4
CALCOCO2
TLE4
NEK2
TRAP1
TUBB6
GSTO1
MYO7A
ZEB1
PAAF1
NIPSNAP1
CASK
MYH10
ZFPM2
EIF2AK1
MAGED1
RTN1
UBE2C
MAN2A2
ID2
CCNB1
CCT3
GMNN
PAFAH1B3
PAICS
PCCB
PSMF1
CRABP2
CPT1A
HIF3A
RNF43
CDC20
NCOA1
GADD45B
HNRNPD
MAP4
PYCR1
TRIM27
FNBP1
NEDD9
H2AFY
TJP2
CNKSR1
RASL12
PSMD4
KAT6A
PTPN1
MPP6
PGC
ULK2
STAM2
SORBS1
H2AFX
SMARCA5
MAPRE2
GHR
QPRT
SATB1
ASF1B
NCF2
TRAF4
TRIP13
GPS1
GABARAPL1
SEC24A
KRT15
NFATC1
MED14
NQO1
SOCS2
LAMA4
SEMA6A
ILK
SYNM
SFXN1
TIE1
PTPRB
GFPT1
SGCE
SERPINB9
SERPINH1
LGALS3BP
RPA3
KAT2A
WDR12
ABLIM1
SMAD6
SRF
MTMR9
MRTO4
FLNB
CSTF2
DOCK9
NOL3
SIRPA
LARP1
CSF2RB
PARVA
NUDT1
KIF1C
GART
RAI2
SAP18
SPTBN2
SPTAN1
ITSN2
TUBG1
RGL1
QDPR
TSTA3
ITPR1
DES
DDX56
VPS72
TOP2A
LAMB2
LDLR
PDLIM1
HUS1
FOXM1
SNRK
PLSCR4
FAF2
CFP
FHL1
NFATC3
LMO7
CTDSP1
CDH5
KLC1
RAB11FIP2
OSBPL3
RAB11FIP1
HSPB2
MT1M
REEP1
CEACAM5
DAZAP2
MECP2
ADRB2
FAP
STRA13
FBLN5
PLA2G1B
ZMYM4
KCTD13
KCTD12
GTF2IRD1
ARMC8
KLF2
AMOTL2
PPP2CB
FAM107A
PPP3CC
SDC1
MRPL12
ADAMTS1
WASF2
JAM2
JAM3
CDK16
C14orf169
FAM189A2
TSC22D3
SNCA
EHD1
KLF11
MLST8
MELK
PSMD3
DHFR
MED8
PPFIBP1
STIP1
HEATR1
UGGT1
DUSP1
RACGAP1
MTX1
AP1S1
DOK2
RAPGEF2
SH3BP5
FRYL
FABP4
FANCI
ATIC
DUSP3
ZNF423
GRIA1
RAE1
FBXL5
STOM
MYH11
FBXO7
RIN2
GAPDH
ANKS1A
ZWINT
SSR4
ACTG2
MORC2
DOCK6
KCNN4
PTPRU
EDNRB
EDNRA
LGR4
CDKN3
MB
WARS
APBB2
SH2B3
CLIC4
CRYAB
CDO1
PAPSS2
H1F0
PPAT
PPP3CB
PROS1
FABP5
NKIRAS2
PTRF
FHL5
MCM2
TPX2
SHMT2
SPTBN1
GRK5
ZZEF1
MKI67
PIP5K1B
CBX3
SRPRB
KIF20A
LRRC20
SVEP1
CHPF
MACF1
SPARCL1
TCF21
TRAK1
WBP4
HEY1
LDB2
STX12
S100A3
JAG1
GOLPH3L
HBD
DCHS1
ACACB
LIMS2
PAFAH1B1
DIXDC1
MEIS2
MCM4
TFRC
EZH1
ZNF331
ZNF512B
VWF
KLF9
RNASEH2A
GTF3C2
DAP3
ARHGEF16
PKP3
ANK2
PCDH9
PCDH7
ITM2B
PRELP
MBNL1
TMED10
PHF2
TMEM109
CSRP1
IL7R
RDX
ANP32E
INPP1
KIF2C
FKBP1B
GMFG
LAGE3
CNN1
PFDN6
TPBG
ABCC3
AGR2
ALDOA
PTGDS
PPME1
PC
PLEKHO2
PTGER4
KIF4A
NCAPG
TIMP1
PTGIR
SELRC1
GNA11
RASIP1
ATAD3A
SOSTDC1
ELMO1
EIF3B
CD36
AGER
EGFL7
MFAP3L
PPAP2B
STARD13
KRT4
USP12
MARCKSL1
CFD
OPTN
ARHGEF6
FXYD1
SH3GL3
RRM2
GSDMB
STK39
SGCG
SEPP1
ROBO4
PNRC2
ARHGEF3
HLX
EXOSC4
MPZL1
MCAM
NPM3
FEN1
HJURP
PSIP1
PTRH2
SEZ6L2
CAST
LCAT
ZCCHC2
C5AR1
GNAQ
DAPK2
BDNF
LEPR
ROR1
EFEMP1
PBK
ALOX5
RAPGEF4
BOP1
STX7
CXCL14
GLB1L2
PPP2R5A
FKBP3
PCDH17
ARHGEF15
KIF14
DOCK4
CTPS2
ATP2A2
SPDEF
SEL1L3
NACC2
VSIG4
TPI1
IFT88
PKIA
MSR1
HPRT1
PLA1A
PHC1
ETF1
DAP
CCDC92
FBXO11
VIPR1
ERO1L
EPCAM
SYNE1
KCNAB1
EIF5
FEZ1
TSPAN6
GPRASP1
WDR3
HHAT
ARHGAP25
NFE2L3
SLC7A7
THBD
RBP4
PLCL1
HSPB8
UBFD1
NPR1
IQSEC1
SLC39A4
HMGB3
LAMC3
LTBP4
BMP6
EFNB2
STK10
ITM2A
ARHGAP44
HEG1
LAMA2
ARHGEF4
KANK2
MLF1IP
CASP1
CD34
SPATS2
UBE2K
NFS1
TIMELESS
STX2
VSIG10
SERPINB6
FERMT2
SMG7
ZNF212
PID1
INPP5K
PTGIS
SLC2A3
MRC1
SSFA2
ARAP3
ATP1B3
H2AFJ
DBF4
ITIH5
FTSJ2
SLC25A10
PDLIM2
LRRC15
KCNK1
KCNK3
NUP62
OLR1
NPR3
PDE2A
PNPLA6
COL10A1
ICAM2
ITGA8
TNFAIP1
YME1L1
MYLK
COL5A1
PILRA
LZTFL1
NHP2
F8
PDXK
ABCG1
AHCY
GINS2
CRBN
MPDZ
PTH1R
TCF7L1
LONRF1
INPP5A
KIF2A
KIF11
DECR2
SERPING1
PTPRM
DEPTOR
DIAPH2
TNFRSF21
PPP1R16B
SESN1
FOXF2
EFNA4
BZW2
NHLRC2
ADD1
NEK7
TBC1D4
PAPSS1
TBC1D2B
IL3RA
TSPAN9
GIMAP4
NME4
PUS1
SNX1
AGTPBP1
GPM6B
SYT11
ADH1B
N4BP2L2
CCNO
ITIH3
METTL1
POLD2
NFASC
IP6K1
SCRN1
HPCAL1
MTX2
SWAP70
PTPRN2
KDELR2
PLCB4
RNF38
FUT1
PPM1F
AOX1
DHX32
GALNT2
FPR1
THBS2
HK3
COL11A1
PDE3B
CRTC3
MICALL2
GAS2L1
CASKIN2
WDFY3
MYL9
HLF
RCAN1
F2RL1
CHAF1B
LRRC59
TINF2
NRGN
AP1S2
